# Supplementary material for: Plasma Proteins and Platelets Modulate Neutrophil Clearance of Malaria-Related Hemozoin Crystals
Source: Cells. 2019 Dec 30;9(1):93. doi: 10.3390/cells9010093 (PMC7017347; doi:10.3390/cells9010093)
Supplement: Supplementary file 1 [file cells-09-00093-s001.pdf]

## Supplementary Materials

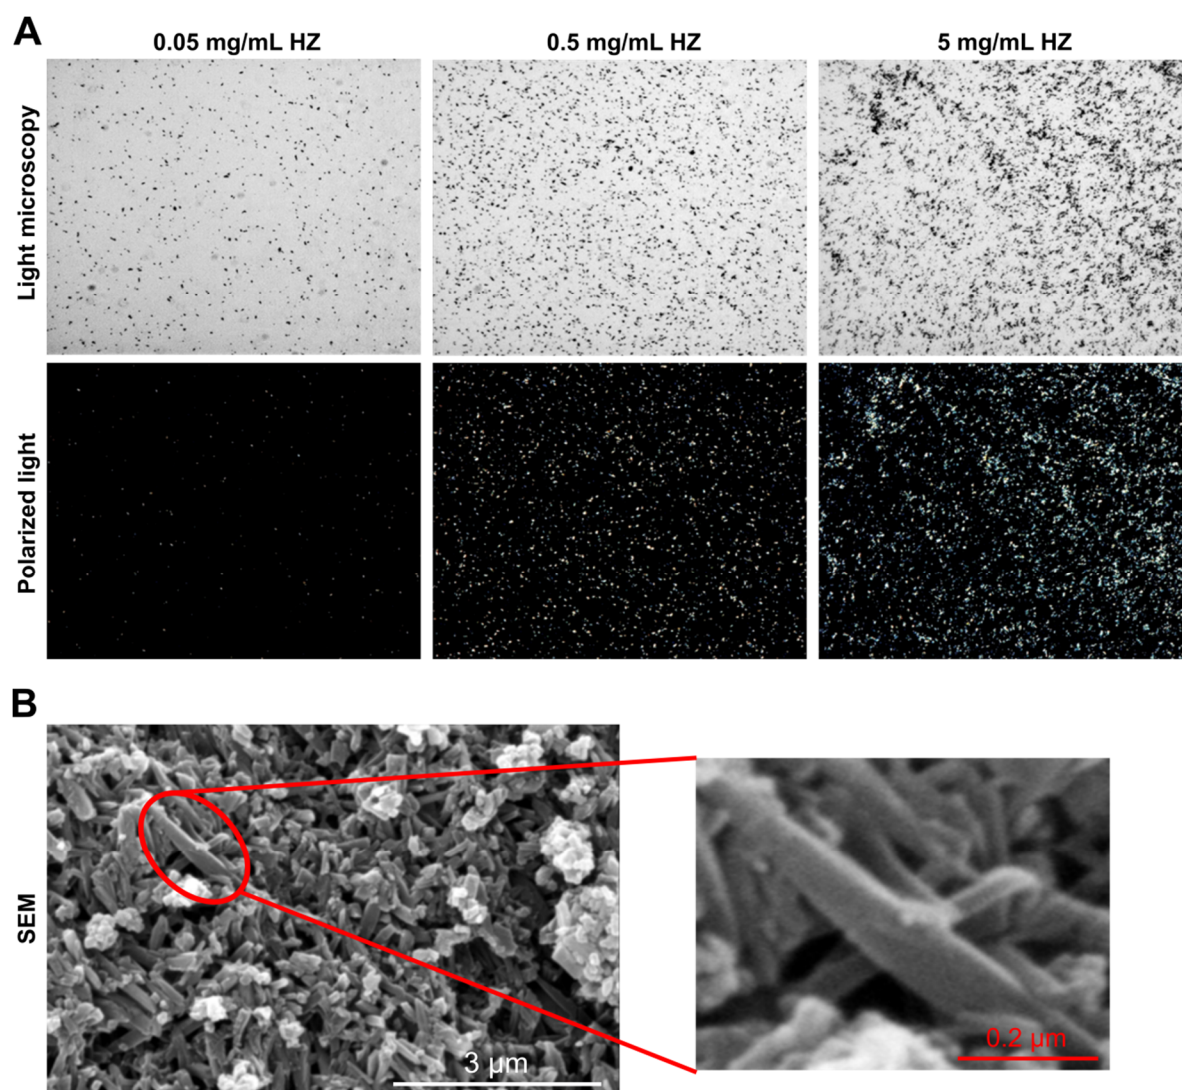

**Figure S1:** Morphology of hemozoin crystals. (A) Hemozoin (HZ) at different concentrations (0.05, 0.5 and 5 mg/mL) visualized as crystalline purple-black pigment under the light microscope, which is birefringent under polarized light (25 $\times$  magnification). (B) Scanning electron microscopy (SEM) illustrates very small and uniform HZ crystals (0.1–1  $\mu\text{m}$  in size).
